# Supplementary material for: Wear Behaviours and Oxidation Effects on Different UHMWPE Acetabular Cups Using a Hip Joint Simulator
Source: MDPI journal article supplement (doi:10.3390/ma11030433), 2018-03-16
Supplement: s1 [file s1]

## Supplementary

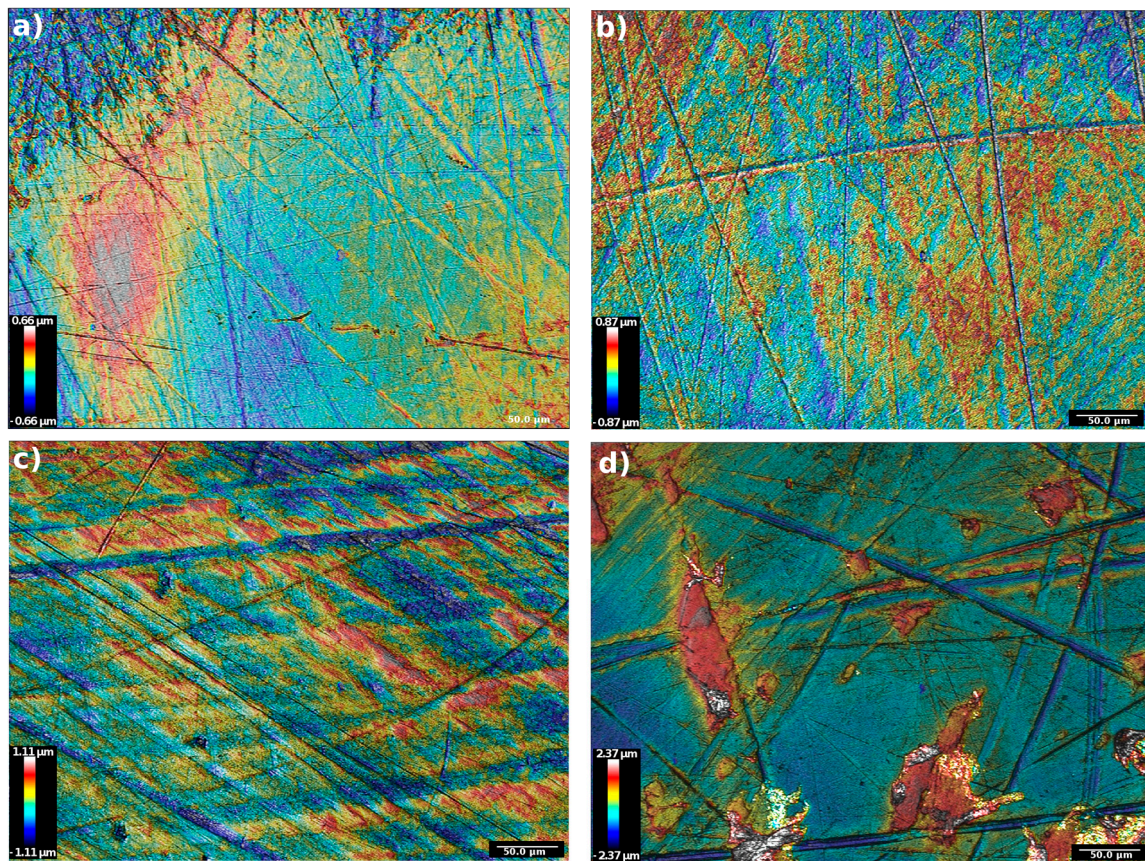

**Figure S1** – Supplementary figure with a second set of contour images of the topographies acquired on the worn inner surfaces of four loaded specimens: a VE; b STD; c XL-75; d XL-50. The observations are very similar to the ones described for Figure 4.
